# Supplementary material for: Study on the differences of phyllosphere microorganisms between poplar hybrid offspring and their parents
Source: PeerJ. 2022 Mar 15;10:e12915. doi: 10.7717/peerj.12915 (PMC8932310; doi:10.7717/peerj.12915)
Supplement: Supplemental Information 1 [file peerj-10-12915-s001.xlsx]

## Sheet: Sheet1
Sample	Leaf area (mm2)	Leaf moisture content (%)	Soluble sugar	Starch
PSPNDH2	4365.5	0.875732	169.624	125.654
PSPNDH2	3996.6	0.878054	147.364	109.209
PSPNDH2	4169.3	0.875732	132.413	71.8316
PSPNDH2	3901.8		146.201	99.4906
PSPNDH2	4713.08		148.692	115.189
PSPNDH3	4334	0.855876	155.503	109.956
PSPNDH3	4745.5	0.853188	150.354	106.966
PSPNDH3	4158	0.858562	126.266	71.0841
PSPNDH3	3800.8		130.585	81.5496
PSPNDH3	4707.52		132.911	104.723
PSPNDH1	4042	0.845854	136.75	124.907
PSPNDH1	3343.4	0.849208	123.608	83.0447
PSPNDH1	4858.8	0.842516	133.243	111.451
PSPNDH1	4070.1		135.237	122.664
PSPNDH1	3589.44		142.048	205.641
PNDH5	2565.7	0.817925	126.599	79.307
PNDH5	2473.1	0.782984	157.497	88.2775
PNDH5	2930.7	0.837346	133.576	80.0546
PNDH5	2335.5		117.628	71.0841
PNDH5	2475.34		123.276	74.0742
PSDH4	3531.8	0.826634	145.868	82.2972
PSDH4	2968	0.852325	151.35	90.5201
PSDH4	3326.8	0.823014	146.201	89.025
PSDH4	3194.2		130.087	75.5693
PSDH4	2732.64		156.168	109.209

## Sheet: Sheet2
	Plant height (m)	Diameter at breast height (cm)	Length of petioles (cm)
PSPNDH1	5.4	3.589	4.55
PSPNDH1	5.9	4.451	4.15
PSPNDH1	6	5.019	4.45
PSPNDH1	5.89	5.026	4
PSPNDH1	6.12	5.26	4.5
PSPNDH1	5.95	5.428	4.85
PSPNDH1			4.5
PSPNDH1			4.45
PSPNDH1			4.55
PSPNDH2	6.2	5.061	4.7
PSPNDH2	6.35	5.35	5.01
PSPNDH2	5.87	5.798	4.72
PSPNDH2	5.9	6.01	4.65
PSPNDH2	6.55	6.183	5.15
PSPNDH2	7.4	7.113	5
PSPNDH2			4.75
PSPNDH2			4.55
PSPNDH2			4.75
PSPNDH3	5.4	4.667	4.8
PSPNDH3	5.5	5.074	4.5
PSPNDH3	6.18	5.327	4.85
PSPNDH3	6.28	5.446	4.95
PSPNDH3	5.72	5.549	4.55
PSPNDH3	6.08	5.55	4.85
PSPNDH3			4.75
PSPNDH3			4.55
PSPNDH3			5
PSPNDH4	3.74	2.893	1.55
PSPNDH4	4.12	3.221	1.71
PSPNDH4	3.88	3.351	1.25
PSPNDH4	3.87	3.655	1.69
PSPNDH4	4.25	3.761	1.75
PSPNDH4	4	3.796	1.72
PSPNDH4			1.52
PSPNDH4			1.32
PSPNDH4			1.45
PSPNDH5	3.54	1.55	3.4
PSPNDH5	3.21	1.623	3.65
PSPNDH5	3.95	1.958	3.3
PSPNDH5	4.71	2.053	4.12
PSPNDH5	4	2.086	3.74
PSPNDH5			3.72
PSPNDH5			3.95
PSPNDH5			3.45
PSPNDH5			2.95
